# Supplementary material for: UPF1 Promotes Chemoresistance to Oxaliplatin Through Maintenance of Stemness by Increasing Phosphorylated TOP2A in Colorectal Cancer.
Source: Research Square preprint supplement (doi:10.21203/rs.3.rs-130880/v1), 2020-12-22
Supplement: Supplementary file 1 [file 18f51bc7c493b3ed1fa633fe.docx]

Table S2-The formulation of mammosphere medium

| Component | Initial concentration | Final concentration | Volume in 50mL |
| --- | --- | --- | --- |
| DMEM | - | - | 24 mL |
| DMEM/F12(1:1) | - | - | 24 mL |
| BSA/PBS | 10% | 0.4% | 2 mL |
| B27 | 50× | 0.2× | 200 μL |
| EGF | 50mg/mL | 10ng/mL | 1 μL |
| FGF | 50mg/mL | 10ng/mL | 1 μL |
